# Supplementary material for: Peripheral glia and neurons jointly regulate activity-induced synaptic remodeling at the Drosophila neuromuscular junction
Source: eLife. 2025 Nov 21;14:RP104126. doi: 10.7554/eLife.104126 (PMC12638043; doi:10.7554/eLife.104126)
Supplement: Figure 2—figure supplement 1—source data 1. [file elife-104126-fig2-figsupp1-data1.xlsx]

## Sheet: Fig2A_sup
Genotype		REPO-GAL4>Trip		REPO-GAL4>shv37507-RNAi				Genotype		REPO-GAL4>Trip		REPO-GAL4>shv37507-RNAi
Analysis	BOUTON SIZE							Analysis	GLUR3
Treatment		unstim	stim	unstim	stim			Treatment		unstim	stim	unstim	stim
		1.07781	1.42202	0.921086	1.10776					0.98033	1.59177	1.10561	1.08223
		1.10374	1.06252	1.0449	1.21926					0.901945	1.62755	1.30122	1.26286
		0.95396	0.99277	0.953088	1.23654					1.09657	0.907013	1.20677	1.26537
		0.864488	1.01653	0.817387	0.950952					1.02115	1.44348	0.948152	1.13019
		0.844503	1.07073	0.884452	0.775092					0.876487	1.06489	1.2511	0.823811
		1.06361	1.19895	0.723352	0.97847					1.05569	1.06325	1.08006	1.02532
		1.05744	1.06272	1.10057	0.8988					0.981164	1.15186	0.993864	0.952522
		1.03444	0.9912	0.875086	1.18164					1.08666	1.78247	1.11563	0.762298
		0.957714	1.26651	0.931558	1.17714					1.10177	1.41947	1.04693	1.30105
		1.008	1.14811	0.905829	1.54709					1.00681	2.34214	1.1487	1.13047
		1.03429	1.36451	1.34953	1.19063					0.891421	1.64308	1.66292	1.10257
		1.26302	1.08381	1.2598	0.93562					1.15395	1.6904	1.44101	1.17138
		0.850404	1.7848	1.15966	1.01908					0.844258	1.13448	1.30087	0.820787
		0.84619	2.43006	1.04378	1.16306					0.976683	1.36545	1.68689	0.86316
		1.04038	1.48898	0.989234	1.04788					1.02511	1.34401	1.04006	1.3351
		0.888841		0.83334	0.902134					0.812869		1.16318	1.34953
		1.11201		1.11656	0.600606					1.09293		1.01629	1.77715
		0.999145								1.0942		1.26318
Descriptive statistics	Sample size (n)	18	15	17	17			Descriptive statistics	Sample size (n)	18	15	18	17
	Normalized mean	1	1.29228	0.994659	1.05481				Normalized mean	1	1.45375	1.21059	1.10886
	Std. Error of the Mean	0.026494	0.099581	0.0398072	0.0518326				Std. Error of the Mean	0.0235596	0.0938978	0.0497685	0.06115
t-test of stim vs unstim (unpaired)			0.011918		0.364729			t-test of stim vs unstim (unpaired)			0.000357255		0.301857
t-test to unstim driver control (unpaired)				0.911862				t-test to unstim driver control (unpaired)				0.00084669

## Sheet: Fig2B_sup
Western blot analysis - fold change to control after normalizing to loading control
Genotype/condition		Repo-GeneSwitch>shv-RNAi		Repo-GAL4>		Tub-GAL4>
		EtOH	RU486	+	shv-RNAi	+	shv-RNAi
		1	0.841479	1	0.808764	1	0.01531
		1	0.452249	1	0.852324	1	0.012833
		1	0.793008	1	0.469152	1	0.0473075
		1	0.597793	1	0.673896
		1	0.860545
Descriptive statistics	Sample size (n)	5	5	4	4	3	3
	Normalized mean	1	0.709015	1	0.701034	1	0.0251502
	Std. Error of the Mean	0	0.0793291	0	0.08612	0	0.0111017
t-test to driver control (unpaired)			0.0214273		0.0403024		0.000129664
