# Supplementary material for: Peripheral glia and neurons jointly regulate activity-induced synaptic remodeling at the Drosophila neuromuscular junction
Source: eLife. 2025 Nov 21;14:RP104126. doi: 10.7554/eLife.104126 (PMC12638043; doi:10.7554/eLife.104126)
Supplement: Figure 2—source data 1. [file elife-104126-fig2-data1.xlsx]

## Sheet: Fig 2A
Genotype		ELAV-GAL4>Trip		ELAV-GAL4>shv-RNAi		REPO-GAL4>Trip		REPO-GAL4>shv-RNAi		24B-GAL4>Trip		24B-GAL4>shv-RNAi			Genotype		ELAV-GAL4>Trip		ELAV-GAL4>shv-RNAi		REPO-GAL4>Trip		REPO-GAL4>shv-RNAi		24B-GAL4>Trip		24B-GAL4>shv-RNAi
Analysis	BOUTON SIZE														Analysis	GLUR3
Treatment		unstim	stim	unstim	stim	unstim	stim	unstim	stim	unstim	stim	unstim	stim		Treatment		unstim	stim	unstim	stim	unstim	stim	unstim	stim	unstim	stim	unstim	stim
		0.740472	1.42419	0.629	0.744671	0.952064	1.43868	1.04384	1.01006	0.966831	1.3056	0.953737	1.79225				0.798364	1.08499	0.90441	0.699046	1.33365	1.23669	1.33392	1.02085	0.708585	1.42177	1.26622	1.24624
		0.924477	1.9743	0.659413	0.877267	0.978548	1.08699	0.734977	1.26859	0.901227	1.33068	0.946157	1.82009				1.04	0.99141	0.962801	0.935383	1.31945	1.27532	1.34013	0.891817	1.26349	1.40234	0.931085	1.33639
		1.16434	1.35904	0.715531	0.814914	1.2245	1.36553	0.958227	0.933818	1.13194	1.28217	0.914733	1.69109				1.09445	1.0063	0.754306	1.04755	0.774824	1.5872	1.13086	0.880359	1.02793	1.30974	1.05871	1.51351
		1.17071	1.18916	0.870141	0.830718	1.01843	1.56022	0.819696	1.0768	1.07639	2.25832	0.838379	1.9175				1.06718	1.14152	1.04989	0.798055	0.861338	1.46005	1.61142	1.06835	1.00903	1.13096	0.938704	1.5222
		0.966864	0.947507	0.80909	0.74637	1.0611	1.56968	0.97498	1.2348	0.850167	2.93995	0.93483	1.94901				0.866858	2.02981	0.86936	1.03528	0.911725	1.3063	1.73839	1.07766	0.896528	1.38345	0.855992	1.80697
		1.03314	1.04754	0.60201	0.69003	0.991634	0.966455	1.06423	0.679405	1.07344	1.91573	1.2276	1.82122				1.13314	1.45137	1.07144	0.559246	0.920273	1.59367	1.67936	1.027	1.09444	1.38248	0.883876	1.21261
		0.959233	1.3062	0.952492	0.638989	0.773731	1.46147	0.852842	1.07679	0.985269	1.01674	1.12148	1.98602				0.99315	1.47332	0.747448	0.578648	0.878736	1.03576	1.64654	1.16747	0.701516	1.0459	0.896522	1.48391
		1.08277	1.38894	0.761942	0.89066	0.984993	1.57648	0.991939	0.916045	1.03411	1.76668	0.911075	1.41199				0.921329	0.968376	0.901831	1.10178	0.647849	1.26615	1.412	1.33054	1.3362	2.06481	1.39679	1.21666
		1.00058	1.03934	0.902716	0.868935	0.820925	1.01468	1.10492	0.970344	1.06278	1.3973	0.716586	2.063				0.724176	1.03818	0.751825	0.646376	1.20476	1.09286	1.37313	1.52031	1.05819	1.63167	1.05651	1.87505
		0.957418	1.02223	1.06626	1.01828	1.26293	1.19711	1.07621	0.897881	0.917846	1.32339	0.83861	1.74219				1.36134	0.960933	0.61986	0.93554	0.830918	1.33336	1.6188	1.23755	0.904094	2.0986	1.54745	1.20569
		1.00953	1.19679	0.953379	0.862386	0.882255	1.29789	0.636154	1.09379		1.10023		2.24614				1.38711	1.40086	0.802332	0.900566	0.827444	1.44369	0.79017	0.974785		2.21909		1.54807
		1.13364	1.17564	0.88104	0.671901	0.97718	1.0516	0.961359	0.781861								0.653282	1.36621	0.515384	0.64444	1.06305	1.39555	1.10326	1.15282
		0.85683	1.29947	0.945503	1.11366	1.07171	1.43442	0.975618	0.963313								0.959603	1.54618	0.995326	0.471241	0.764295	1.43725	1.10221	2.90477
						1.11783	1.24945	0.921319	1.21606												0.840128	1.32577	1.2389	2.82846
						0.937039	1.2936	0.97679	0.982951												1.66873	1.63552	1.25276	2.85131
						1.01721	1.36801	1.07425	1.15994												0.969189	0.959125	1.00418	2.52267
						1.1038	1.27674	0.897312	0.716517												1.17799	0.882257	1.22221	3.00107
						0.890889	1.58409	0.821664	0.85806												0.671731	1.87952	3.11817	3.32642
						1.02934	1.26961	0.835937	0.969868												0.907937	1.98663	3.50276	2.51577
						0.965348	1.22798	0.932043	1.12331													1.80133	3.51838	3.02386
						0.923717	1.87527	1.05646	1.19015													1.99106	2.16348	2.87179
						1.01483	1.15352	0.923717	0.800492													1.51263	2.17892
								1.17483														1.94598	1.84301
								0.729601															1.698
								0.940132															1.8246
								0.842122															1.95567
								0.877567															2.70896
																							2.49984
Descriptive statistics	Sample size (n)	13	13	13	13	22	22	27	22	10	11	10	11		Descriptive statistics	Sample size (n)	13	13	13	13	20	23	28	21	10	11	10	11
	Normalized mean	1	1.25926	0.826809	0.828368	1	1.3327	0.933286	0.996401	1	1.60335	0.940319	1.85823			Normalized mean	1	1.26611	0.842017	0.796396	1	1.45146	1.77179	1.86646	1	1.55371	1.08319	1.45157
	Std. Error of the Mean	0.0339852	0.0730052	0.0399046	0.0375475	0.0245468	0.0469484	0.0240583	0.0356529	0.0286773	0.173833	0.0456921	0.0652401			Std. Error of the Mean	0.0607503	0.087418	0.0456119	0.0581437	0.0594336	0.066499	0.136516	0.19995	0.0657894	0.120668	0.075931	0.0709032
t-test of stim vs unstim (unpaired)			0.0050419		0.977543		5.04869e-07		0.150469		0.00602627		1.3109e-09		t-test of stim vs unstim (unpaired)			0.0206194		0.543151		4.34376e-06		0.698014		0.00105105		0.00219715
t-test to unstim driver control (unpaired)				0.0030494				0.0583664				0.285864			t-test to unstim driver control (unpaired)				0.0492767				8.61507e-06				0.418734

## Sheet: Fig 2B
Genotype		REPO-GAL4/+ EtOH		REPO-GAL4>shv-RNAi EtOH		REPO-GAL4/+ RU486		REPO-GAL4>shv-RNAi RU486					Genotype		REPO-GAL4/+ EtOH		REPO-GAL4>shv-RNAi EtOH		REPO-GAL4/+ RU486		REPO-GAL4>shv-RNAi RU486
Analysis	BOUTON SIZE												Analysis	GLUR3
Treatment		unstim	stim	unstim	stim	unstim	stim	unstim	stim				Treatment		unstim	stim	unstim	stim	unstim	stim	unstim	stim
		0.7664	1.20528	0.736806	1.49814	1.27688	1.30881	0.945225	0.772978						0.506151	1.47021	0.502919	0.764341	0.676522	1.03764	1.17706	0.850683
		0.860175	1.30893	0.803221	1.1308	0.836257	1.38616	0.85867	1.23381						0.546629	1.67767	1.18919	1.60231	0.768496	1.20032	1.23597	0.661591
		0.885748	1.33026	0.965832	1.09154	1.29229	1.3891	0.63015	1.0864						0.642055	1.75168	0.499364	1.25709	0.890889	1.44528	1.53765	1.07458
		0.904723	1.35227	0.494259	1.54982	0.980126	1.2265	0.773508	1.43864						0.758031	1.75392	0.754731	1.38161	0.918972	1.48587	1.79741	1.37308
		0.917936	1.45844	1.04817	1.19341	1.23482	1.14286	1.02796	0.916438						0.760055	1.95198	0.736551	1.15136	1.04704	1.71547	1.94018	1.65614
		0.945107	1.5102	1.16692	1.20433	1.41615	1.2361	1.12001	0.802222						0.895725	1.95657	0.880145	1.51278	1.0573	1.77732	1.59413	1.64257
		0.945828	1.9725	1.03859	1.41976	0.677828	1.33743	1.32979	0.934483						0.918141	2.05468	1.10942	1.05789	1.25816	1.77867	1.1888	1.83512
		1.04513	1.44932	0.96096	1.33551	0.988457	1.72531	1.20779	0.981736						1.01974	0.893467	0.780537	1.40946	1.38263	1.9225	1.24535	1.54835
		1.04918	1.49759	1.09243	1.22226	1.00678	1.59147	1.25291							1.14657	1.1784	1.24771	1.45927	0.917451	1.95405	1.6163
		1.06804	1.61845	1.28277	1.60465	0.932673	1.34121	1.0768							1.29059	1.18465	1.37131	1.61543	0.908341	2.06803	1.26248
		1.22295	1.81207	0.808274	1.31249		2.11315	0.69109							1.46062	1.31454	0.89948	1.1202	1.21707	2.29257	1.4172
		1.38878		0.928267	1.20984		1.48875	1.18642							1.46062		1.02806			1.95777	1.4551
		0.956048		1.26346	1.42085			1.21787							1.59507		1.07246			1.62284	1.53148
		1.08672			1.25889			1.16646							0.779978
		0.996005			1.371										1.02503
		0.961226			1.22047										1.02929
					1.69456										1.1657
					1.36298
					1.68144
Descriptive statistics	Sample size (n)	16	11	13	19	10	12	14	8				Descriptive statistics	Sample size (n)	17	11	13	11	11	13	13	8
	Normalized mean	1	1.50139	0.968458	1.35699	1.06423	1.44057	1.00836	1.02084					Normalized mean	1	1.56252	0.928605	1.30289	1.0039	1.71218	1.46147	1.33026
	Std. Error of the Mean	0.0370724	0.0682953	0.0612381	0.0416262	0.0626214	0.0708679	0.0591433	0.0794319					Std. Error of the Mean	0.0784354	0.114528	0.0753916	0.0787336	0.0644853	0.097489	0.0664428	0.149433
t-test of stim. vs. unstim.			8.37588e-06		2.70782e-05		0.0020491		0.89125				t-test of stim vs unstim (unpaired)			0.000681472		0.00241909		6.1378e-06		0.441376
Tukey's test (following one-way ANOVA)				0.975755		0.862452		0.966528					Tukey's test to unstim Repo-GAL4/+ Ethanol control (after one-way ANOVA)				0.891975		0.999982		0.000166547
