# Supplementary material for: Peripheral glia and neurons jointly regulate activity-induced synaptic remodeling at the Drosophila neuromuscular junction
Source: eLife. 2025 Nov 21;14:RP104126. doi: 10.7554/eLife.104126 (PMC12638043; doi:10.7554/eLife.104126)
Supplement: Figure 3—source data 1. [file elife-104126-fig3-data1.xlsx]

## Sheet: Fig 3B
Genotype		Nrv-GAL4>Trip		Nrv-GAL4>shv-RNAi		Gli-GAL4>Trip		Gli-GAL4>shv-RNAi		PG-GAL4>Trip		PG-GAL4>shv-RNAi		Alrm-GAL4>Trip		Alrm-GAL4>shv-RNAi				Genotype		Nrv-GAL4>Trip		Nrv-GAL4>shv-RNAi		Gli-GAL4>Trip		Gli-GAL4>shv-RNAi		PG-GAL4>Trip		PG-GAL4>shv-RNAi		Alrm-GAL4>Trip		Alrm-GAL4>shv-RNAi
Analysis	BOUTON SIZE																			Analysis	GLUR3
Treatment		unstim	stim	unstim	stim	unstim	stim	unstim	stim	unstim	stim	unstim	stim	unstim	stim	unstim	stim			Treatment		unstim	stim	unstim	stim	unstim	stim	unstim	stim	unstim	stim	unstim	stim	unstim	stim	unstim	stim
		1.31713	1.22655	0.703857	1.28268	0.935525	1.52818	1.03167	0.694903	0.873208	1.35315	1.23033	0.959519	1.15024	1.43697	0.966594	0.909657					0.684209	1.25471	0.695616	1.19235	0.737764	1.95903	1.56617	2.27011	1.09883	1.31964	0.902453	1.03594	1.07568	1.4734	0.972189	1.38443
		0.968237	1.52257	0.671785	0.907777	0.980801	1.07364	0.794103	0.68244	1.17374	1.76453	1.17062	0.946446	0.859282	0.952561	0.914692	0.886016					0.94783	1.28805	0.85736	1.05883	0.698223	2.04323	2.25697	2.23707	0.997549	0.972604	1.0586	1.09315	1.43447	1.66274	1.74449	1.50298
		0.928147	0.981023	0.861402	0.790323	1.02887	1.66528	0.873462	0.752897	1.01478	1.62601	1.03721	1.1568	1.2018	1.15912	0.813647	1.10936					0.625625	1.13225	0.903292	1.45006	0.957885	1.57252	1.55355	2.20869	0.806275	1.02824	1.0043	1.15304	1.19942	1.64083	0.904096	1.60232
		1.33729	1.26274	0.71881	0.817194	0.992474	1.36106	1.02302	1.17996	0.938275	1.22273	1.1152	1.02726	1.04656	1.12087	0.863815	0.803092					0.761845	1.3371	0.909992	1.40654	1.03608	2.36424	1.54916	2.02516	1.09735	0.995306	1.06486	1.16284	1.19412	2.05118	1.39327	1.58756
		0.806792	1.29785	0.817627	0.811993	0.887197	1.44856	1.08247	0.932727	0.983882	1.57114	0.85531	1.1488	0.791257	1.7011	1.13829	1.10557					1.14216	1.02782	1.12252	1.57598	1.24477	1.24384	1.56617	1.72364	0.818657	1.12179	1.31964	1.10611	0.325257	2.19931	1.412	1.59363
		0.717076	1.47814	0.757817	1.00378	1.17513	1.42109	1.36163	0.919755	1.17987	1.26651	0.716053	0.863537	0.950861	1.27564	0.677588	0.783103					1.49601	1.29791	1.00309	1.6603	1.67922	1.26374	2.25697	2.0382	0.965238	1.20352	0.972604	1.09029	0.771056	2.80732	1.09341	1.9631
		0.92533	1.12166	0.843415	1.0599	1.02456	1.34855	0.7042	0.786217	0.947779	1.73154	1.012	1.02029	0.926476	1.22142	0.946715	1.13554					1.34233	1.18766	1.19373	1.59997	0.695243	1.74683	1.55355	2.08083	0.909429	1.23071	1.02824	0.78035	0.964342	1.25753	1.29386	1.27658
		1.05762	2.0043	1.15342	1.39545	0.9	1.18255	0.875767	0.864378	0.888466	1.44067	1.01274	1.79866	0.854223	1.57734	0.926142	1.45042					1.07285	0.912311	0.83578	1.48821	0.950811	1.74192	1.54916	2.27011	1.30668	1.93448	1.01782	0.990291	1.07787	1.49239	0.973209	1.28644
		0.782377	1.20335	0.738025	1.09563	0.79895	1.37956	0.919628	1.04952	1.02029	1.20741	0.990237	1.20392	0.652668	1.30952	1.01181	1.2201					1.02332	0.989841	0.751845	1.47797	0.737764	1.95903	1.82624	2.23707	1.01639	2.17183	1.01096	0.823214	1.27726	1.31204	1.05045	1.82035
		1.41345	1.66208	0.918729	1.02872	1.17431	1.3975	0.853473	1.1353	0.918454	1.22067	1.45978	1.02332	0.973496	1.45869	0.861865	1.24281					0.817712	1.08118	0.424226	1.32253	0.698223	2.04323	1.48195	2.20869	1.02122	1.66946	1.16756	0.868746	1.00403	1.16624	0.992643	1.50789
		1.00135	1.68894	0.852834	1.00743	0.866317	1.27948	0.691599	1.02843	1.06126	1.39399	1.14291	0.976999	1.42983	1.56096	1.36421	1.06565					0.643188	0.997545	0.615591	1.10186	0.957885	1.57252	1.57393	2.02516	0.962393	2.04546	1.11239	1.00121	0.870514	1.20902	1.13567	1.57832
		0.800879	1.12681	0.724846	1.29053	1.23586	0.983603	1.03167	1.06163	0.97754		1.11984	1.01881	1.16331	1.08878	1.33441	1.20981					1.18524	1.32379	0.758087	0.917912	1.03608	2.36424	2.0819	1.72364	0.981624		1.73324	1.2748	0.805988	1.09628	0.986123	1.54474
		0.944327	1.76244	0.927093	1.2477	0.935525	1.16704	0.794103	1.18788	0.923014		1.02895	0.836287	0.945419	1.25281	1.12511	1.68672					1.25769	1.50063	0.600189	1.2617	1.24477	1.24384		2.0382	1.11317		1.90445	1.44531	0.893101	1.04793	0.960066	0.811339
		0.894864	1.10476	0.986145	1.17758	0.980801	1.52818	0.873462	0.908966	1.01597		1.01705		0.936708		1.13517	1.43781					0.920563	1.28069	0.915588	1.77818	1.67922	1.26374		2.08083	0.855266		2.05826		1.1772	1.11952	0.988097	1.10717
		1.14382	1.3386	1.17549	1.03577	1.02887	1.07364	1.02302	0.694903	1.08348		0.866905		1.10204		0.910859	1.35302					0.970284	1.63389	0.22506	1.14458	0.695243	1.74683		1.31361	1.04994				0.938842	1.0487	1.04762	1.20637
		0.866446	1.41201	1.32972	1.40994	0.992474	1.66528	1.17261	0.68244					0.857261			1.34114					0.948879	1.93848	1.54124	1.47792	0.950811	1.74192		0.916416					1.04395			1.20077
		1.17075	1.32054	1.42799	1.81637	0.887197	1.36106	1.04718	0.752897					1.15857								1.16027	1.93248	1.93495	1.39191	1.15656	1.11469		1.05518					0.946906
		1.10504	2.18906	1.09083	1.35547	1.17513	1.44856	1.1993	1.17996														1.76712	1.05716	1.88327	0.942518	1.21555		1.20229
		0.819083	1.57038	1.30751	1.47654	0.810364	1.42109	1.18639	0.932727														2.03168			1.07895	0.864461
		0.939371	1.57659	0.975677	1.41882	0.825917	1.26315		0.919755														2.4345			0.983575	0.846817
		0.985122	1.6133	1.17242	1.06201	1.08095	1.17482		0.786217														1.75169			0.838393	1.29081
		1.12992	1.5208	0.812975	1.21317	1.08768	1.11664		1.29061														2.06115				1.25731
		0.945586	1.34152	0.916239	1.10901	1.19509	1.19686		1.38619
			1.09237	0.864695	1.26638		1.17678		1.77047
			1.14015	0.926714	1.18384		1.25885		1.51494
			1.13497	0.730799
			0.932499
			0.913199
Descriptive statistics	Sample size (n)	23	28	26	25	23	25	19	25	15	11	15	13	17	13	15	16			Descriptive statistics	Sample size (n)	17	22	18	18	21	22	12	18	15	11	14	13	17	15	15	16
	Normalized mean	1	1.3764	0.938726	1.17056	1	1.31684	0.975725	1.00384	1	1.43621	1.05168	1.07543	1	1.3166	0.999395	1.17124				Normalized mean	1	1.46193	0.908073	1.39945	1	1.56638	1.73464	1.86972	1	1.42664	1.23967	1.06349	1	1.50563	1.12981	1.43587
	Std. Error of the Mean	0.0386035	0.058775	0.0412894	0.0474649	0.0270814	0.0359548	0.0411357	0.0557889	0.0241561	0.0626045	0.0449208	0.0672115	0.0590796	0.0631387	0.0589131	0.0541642				Std. Error of the Mean	0.0601881	0.0896337	0.0920908	0.0602014	0.0620937	0.0937827	0.0850786	0.105164	0.0332269	0.134792	0.100369	0.0504829	0.0597047	0.130101	0.0600348	0.0706991
t-test of stim vs. unstim (unpaired)			2.81339e-06		0.000582512		1.04696e-08		0.687084		2.0063e-05		0.771675		0.000335052		0.0391384			t-test of stim vs. unstim (unpaired)			0.000139125		0.000109458		1.33424e-05		0.326568		0.0103725		0.133269		0.00212427		0.00260135
t-test to unstim driver control (unpaired)				0.283883				0.625444				0.322251				0.99279				t-test to unstim driver control (unpaired)				0.410218				4.86393e-07				0.0377714				0.135763
