# Supplementary material for: Peripheral glia and neurons jointly regulate activity-induced synaptic remodeling at the Drosophila neuromuscular junction
Source: eLife. 2025 Nov 21;14:RP104126. doi: 10.7554/eLife.104126 (PMC12638043; doi:10.7554/eLife.104126)
Supplement: Figure 4—source data 1. [file elife-104126-fig4-data1.xlsx]

## Sheet: Fig 4A
Genotype		REPO-GAL4>Trip		shv1; REPO-GAL4		shv1 ;REPO-GAL4>shv			ELAV-GAL4>Trip		shv1; ELAV-GAL4		shv1 ;ELAVGAL4>shv				Genotype		REPO-GAL4>Trip		shv1; REPO-GAL4		shv1;REPO-GAL4>shv			ELAV-GAL4>Trip		shv1; ELAV-GAL4		shv1;ELAV-GAL4>shv
Analysis	BOUTON SIZE																Analysis	GLUR3
Treatment		unstim	stim	unstim	stim	unstim	stim		unstim	stim	unstim	stim	unstim	unstim			Treatment		unstim	stim	unstim	stim	unstim	stim		unstim	stim	unstim	stim	unstim	unstim
		0.904665	0.829914	0.581394	0.751501	0.994835	0.735655		0.881537	1.71998	0.631537	0.970251	1.26014	1.36753					0.971502	0.973962	0.701196	0.784789	0.571336	0.802497		0.815316	1.78509	0.754911	0.119465	0.851468	1.22785
		1.05531	1.14604	0.85167	0.891414	0.941808	1.09218		0.823639	1.71798	0.783351	1.09632	1.22012	1.59201					0.947569	1.08181	0.806596	0.677887	0.600591	0.761961		0.969103	1.63645	0.795631	0.219653	0.634499	1.29556
		0.862017	1.35363	1.07611	1.09907	0.996186	1.4795		1.29482	1.32858	0.916889	0.813234	1.04816	1.71758					0.980274	0.945412	0.674491	0.767818	0.819281	0.459192		1.21558	1.53305	0.517093	0.151085	1.1589	1.18332
		1.27686	1.34293	0.748411	0.748347	0.784816	0.874809		0.960598	1.52295	0.92516	0.89421	1.12792	1.16549					1.10066	0.842389	0.770083	0.71848	0.460292	0.484254		0.930155	1.16185	0.6716	0.278896	0.944987	1.20764
		0.90115	1.03988	0.932567	0.956741	0.785313	1.22293		1.20866	1.44501	0.708131	0.634349	0.864258	1.13103					1.03816	1.46296	0.538444	0.901856	0.517812	0.849983		0.875148	1.13881	0.354937	0.715972	0.811577	0.942151
		1.19796	1.49107	0.623771	1.06325	0.866197	1.73141		0.830746	1.15489	0.921163	0.581515	1.0588	1.07805					0.894735	1.13116	0.566493	1.02154	0.845763	0.675859		1.1947	1.55058	0.554328	0.699939	0.841318	1.35809
		0.987446	0.957828	0.766936	0.879279	1.06185	1.17637		0.913301	1.50114	0.765205	0.684554	1.24183	1.25625					0.589973	1.49797	0.648215	1.08231	1.01613	1.09715		0.879656	1.18212	0.49099	0.762334	0.962936	1.21186
		0.766785	1.22432	0.778094	0.846724	1.11579	1.21892		1.11534	1.51318	0.727212	0.738491	1.1066	1.1258					1.26684	1.08909	0.798354	0.46619	0.918784	0.859857		1.09649	1.2986	0.398158	0.609539	1.26502	1.38498
		1.04781	1.16998	0.763986	1.19925	0.73308	1.105		0.971364	1.3413	0.60667	1.05747	1.08295	1.18209					1.21029	1.44636	0.805329	0.482481	0.957791	0.746822		1.02385	1.51006	0.509702	0.756294	1.17996	1.22989
		0.815093	1.24114	0.72732	0.716874	1.08368	1.5786		0.901768	2.1674	0.976941	0.945904	0.915473	1.61947					1.15259	1.35734	1.03812	0.667945	0.873195	1.73974		0.824229	0.994542	0.813295	0.591444	1.24102	1.12943
		0.954443	1.1111	0.87807	0.690426	0.887673	1.02101		0.942956	1.80722	1.05599	0.745137	0.974831	1.79419					1.11926	1.47627	1.03895	1.00117	1.22972	2.34686		1.13515	0.98231	0.945143	0.787489	0.780604	1.44375
		1.1286	1.06304	0.835985	0.655173	1.00681	0.763177		1.24642	1.88844	0.704947	1.00296	1.19099	1.65127					1.18613	1.38157	1.16665	1.1158	1.10791	1.08426		1.06407	1.62334	0.989757	0.538143	0.790516	1.5122
		1.00207	1.19755	1.12491	0.846538	0.887673	1.0109		0.908855	2.21841	0.955326		0.969996	1.22891					0.859352	1.03587	0.457088	1.15233	1.00413	1.32592		0.976548	1.36337	0.420268		1.13657	1.10453
		1.0998	0.9881	0.75155	0.754188	0.772751	1.34354		1.11947	2.17533	0.5518		1.124	1.86045					0.63787		1.03449	0.939904	1.79619	1.31468		0.909096	1.1497	0.551863		1.13321	1.22467
		0.98337	1.07961	0.707128	0.918854	0.796208	0.927163		0.972071	1.91769	0.769303		1.1009	1.37405					1.0448		0.529394	0.856414	1.42215	1.1036		0.985617	1.15009	0.408492		0.73111
		1.03075	1.24663	0.700047	1.26106	1.13938	1.39644		0.908456	1.83815	0.763716		1.03811	1.97197					0.833369		0.589604	0.753797	1.03739	2.09134		1.10529	1.54013	0.579068		0.893506
		1.07122	1.0081	0.631699	0.615556	0.989543	0.805607		1.01407	1.77475			0.823849	1.61342					1.07035		0.330982	1.11697	1.53679	2.3239		1.01394	1.16303			1.19801
		0.914661	0.999019	0.588081	0.777988	0.734564	1.16823		0.985931	1.53604			1.19126						0.742014		0.627615	0.758537	0.847411	1.91513		0.986059	1.29805			0.980637
		0.938572	0.996659	0.871394	0.935069	1.03999	1.32639			1.36571			1.34406						1.00563		0.766853		0.608961	2.33496			1.35509			1.23291
		1.10876	1.31654	1.00397	0.907531	1.16755	1.26966												1.34864		0.782079		1.0963	1.2402
		0.973178		0.760854	0.81319	0.866316	1.34464												0.852846		1.06294			1.26418
		0.898484		0.726111	0.650211	1.20504	1.25861												1.14715		0.749312			1.2247
		1.11595		0.752589	0.709257	0.85323	1.42433														0.682763			1.34627
		0.965055		0.957865	0.604504	0.872926	0.83891
		1.09558		0.876852	0.720439	0.651816	0.795971
		1.01066		1.04096	1.20427	0.543612	0.937009
		0.977216		0.868103	1.13763	0.654198	0.817718
		0.777219		0.927175		0.719787	0.702191
		1.13933		0.768257		0.578347	0.586172
		1.15357		0.766148			0.767281
		0.846431		0.932697			0.73517
				0.693426
Descriptive statistics	Sample size (n)	31	20	32	27	29	31		18	19	16	12	19	17			Descriptive statistics	Sample size (n)	22	13	23	18	20	23		18	19	16	12	19	14
	Normalized mean	1	1.14015	0.812942	0.864975	0.887275	1.07921		1	1.68074	0.797709	0.847033	1.08864	1.45468				Normalized mean	1	1.2094	0.746349	0.848123	0.963397	1.27797		1	1.3377	0.609702	0.519188	0.987829	1.24685
	Std. Error of the Mean	0.0221734	0.0364493	0.0242778	0.0365647	0.0329546	0.0526314		0.0329982	0.0704853	0.0364445	0.0494948	0.0316352	0.0702836				Std. Error of the Mean	0.0415971	0.0647119	0.0440338	0.0492223	0.0773408	0.122097		0.0278907	0.0532298	0.0493265	0.0736085	0.0455559	0.0390706
t-test of stim vs. unstim (unpaired)			0.00243014		0.241842		0.00326072			3.80932e-09		0.431049		9.34999e-05			t-test of stim vs. unstim (unpaired)			0.0124989		0.131862		0.0360805			5.74049e-06		0.319133		0.00015076
Tukey's test to unstim driver control (after one-way ANOVA)				6.964e-06		0.0106545					1.1234e-07		0.975675				Tukey's test to unstim driver control (after one-way ANOVA)				0.00417405		0.888623					0.000345015		0.146078

## Sheet: Fig 4B
Genotype		REPO-GAL4>Trip	shv1; REPO-GAL4	shv1;REPO-GAL4>shv			Genotype		REPO-GAL4>Trip	shv1; REPO-GAL4	shv1 ;REPO-GAL4>shv
Analysis	mEPSP(mV)						Analysis	eEPSP(mV)
		0.949	0.344	0.962					50.0579	29.1438	46.9785
		0.936	0.371	0.922					29.9601	12.2331	55.8194
		0.526	1.187	1.12					38.2016	13.1683	16.7163
		1.07	1.315	0.643					18.4029	31.0265	28.45
		0.918	1.016	0.901					37.7739	14.3368	15.6183
		1.502	0.787	1.205					22.605	33.1227
		1.012	0.548	1.367					46.2699	54.163
		0.815	0.627	0.965					43.4867
		0.844	0.584	1.02					40.4679
		1.199	0.353						28.4366
		2.163	0.498						30.314
		1.025	0.647						50.8362
		1.047	0.497
		0.88	0.597
			0.562
			0.689
			0.782
Descriptive statistics	Sample size (n)	14	17	9			Descriptive statistics	Sample size (n)	12	7	5
	Normalized mean	1.06329	0.670824	1.01167				Normalized mean	36.4011	26.742	32.7165
	Std. Error of the Mean	0.102363	0.0671626	0.0683427				Std. Error of the Mean	3.04061	5.7017	8.07373
Tukey's test to driver control (after one-way ANOVA)			0.00304592	0.97578			Tukey's test to driver control (after one-way ANOVA)			0.314665	0.867978
Tukey's test to shv1;Repo-GAL4 (after one-way ANOVA)				0.0339826			Tukey's test to shv1;Repo-GAL4 (after one-way ANOVA)				0.737095

## Sheet: Fig 4C
	condition	Time (min)	w1118 (control)
			NMJ1	NMJ2	NMJ3	NMJ4	NMJ5	NMJ6	NMJ7	NMJ8	NMJ9	Mean	Std. Error of the Mean
	Before tetanus	-0.333333	0.837028	0.575567	0.613837	0.910773	0.869211	0.712952	1.06699	1.01881	0.720447	0.813957	0.0571027
		-0.166667	1.22034	1.17944	1.15113	0.962582	1.05285	0.670612	1.19026	0.858278	0.758732	1.00491	0.0677572
		0	0.942633	1.24499	1.23503	1.12664	1.07794	1.61644	0.742749	0.522914	1.32082	1.09224	0.108064
	After tetanus	0.333333	7.39244	2.26254	7.75981	2.49322	2.74444	3.10414	5.16298	7.84371	4.68465	4.82755	0.779466
		0.666667	7.16949	2.13491	6.95461	2.55448	3.11692	1.70624	5.66074	8.36106	4.59764	4.69512	0.817942
		1	6.95828	2.22256	6.49313	2.49897	3.38013	1.66185	5.47376	8.62649	3.99901	4.59046	0.805099
		1.33333	5.73501	2.25733	6.15972	2.63898	3.28464	1.81687	5.40539	7.96371	4.67334	4.43722	0.689815
		1.66667	5.39961	2.11977	6.67419	2.6396	3.29688	1.52083	5.23498	8.08212	3.81889	4.30965	0.731205
		2	5.83181	2.31146	7.44627	2.5551	3.1668	1.54097	5.0423	7.93987	3.49956	4.37046	0.768625
		2.33333	5.64016	2.26055	6.93695	2.59745	2.99694	1.72433	4.49378	7.93987	2.89484	4.16499	0.738205
		2.66667	5.24316	2.28464	6.43057	2.67496	2.84819	1.63385	4.66212	7.08954	2.44413	3.92346	0.660685
		3	5.60691	2.39489	6.80962	2.5991	2.71047	1.36376	4.63363	7.52265	2.25096	3.988	0.740646
		3.33333	4.47653	2.3934	6.40113	2.73787	2.62844	1.54405	4.59841	6.63497	2.12741	3.72691	0.626011
		3.66667	4.08638	2.39215	6.8604	2.62521	2.48276	1.65536	4.10014	7.2604	2.44065	3.76705	0.677489
		4	3.08996	2.58931	5.77257	2.71402	2.4546	1.5181	3.89554	7.231	2.34406	3.51213	0.614775
		4.33333	2.79563	2.65982	5.92345	2.73499	2.46164	1.56044	4.16333	6.8861	1.80721	3.44362	0.615123
		4.66667	2.76239	2.63574	5.68572	2.72821	2.39094	1.56488	3.89088	6.67709	2.20572	3.39351	0.570801
		5	2.51695	2.71693	6.11261	2.81641	2.27035	1.56556	3.99292	6.80265	1.96818	3.41806	0.618727
	condition	Time (min)	shv1
			NMJ1	NMJ2	NMJ3	NMJ4	NMJ5	NMJ6	NMJ7	Mean	Std. Error of the Mean	t-test to control (unpaired)
	Before tetanus	-0.333333	0.967876	1.04558	1.04575	1.14979	0.814704	1.05605	0.972299	1.00744	0.03949	0.0150559
		-0.166667	0.971199	1.05172	0.913724	1.07938	0.625656	0.967481	1.02216	0.947331	0.0576342	0.527891
		0	1.06092	0.902698	1.04053	0.77083	1.55964	0.976472	1.00554	1.04523	0.0934523	0.747004
	After tetanus	0.333333	3.85863	3.31153	2.82471	1.82655	3.988	1.76435	1.27052	2.69204	0.410348	0.0323201
		0.666667	3.41706	3.20942	1.67268	1.95019	3.69542	1.59486	1.01328	2.3647	0.398256	0.0258177
		1	3.16782	3.22629	1.431	1.85639	3.65379	1.56721	0.874276	2.25383	0.406804	0.0242009
		1.33333	3.05816	3.20697	0.923794	1.78946	3.40735	1.51798	0.748111	2.09312	0.422535	0.012686
		1.66667	3.00997	3.08739	1.00286	1.77898	3.31677	1.46786	0.703916	2.05253	0.406001	0.0191701
		2	2.65024	2.9307	1.11661	1.53897	3.38316	1.50225	0.58795	1.95855	0.391112	0.0165603
		2.33333	2.40141	2.77555	0.87904	1.72738	3.44786	1.50967	0.61968	1.90866	0.386594	0.0192767
		2.66667	2.16588	2.602	0.897315	1.35943	3.24812	1.50764	0.627046	1.77249	0.35654	0.0142365
		3	2.1476	2.40116	0.800348	1.41668	3.44167	1.40334	0.890708	1.78593	0.355445	0.0209366
		3.33333	2.44877	2.18959	0.814147	1.35728	3.23237	1.33433	0.725258	1.72882	0.349446	0.016232
		3.66667	1.8319	2.16445	0.73098	1.27101	3.37753	1.32354	0.782486	1.64027	0.34945	0.016673
		4	1.73719	2.13318	0.825336	1.13098	3.3629	1.42762	0.765865	1.62615	0.343363	0.019869
		4.33333	1.7725	1.89585	0.850323	1.26832	3.61272	1.3114	0.749245	1.63719	0.366376	0.0259843
		4.66667	1.56148	1.9489	0.544505	1.32772	3.49625	1.15518	0.601549	1.51937	0.379738	0.0168671
		5	1.3866	1.95564	0.737693	1.26187	3.48668	1.24329	0.645744	1.53107	0.364956	0.0214628
	condition	Time (min)	shv1;UAS-shv/Repo-GAL4
			NMJ1	NMJ2	NMJ3	NMJ4	NMJ5	NMJ6	NMJ7	NMJ8	Mean	Std. Error of the Mean	t-test to control (unpaired)
	Before tetanus	-0.333333	0.564471	0.762037	1.64297	1.05355	1.48361	1.33963	1.06212	0.943077	1.10643	0.128751	0.0654313
		-0.166667	0.980838	0.837712	0.682935	1.11123	0.436445	0.899505	1.03916	0.833846	0.852709	0.0759326	0.156164
		0	1.25469	1.20025	0.674091	0.835221	1.07994	0.760865	0.898717	1.02308	0.965857	0.0736033	0.350419
	After tetanus	0.333333	5.52455	2.1858	3.39846	3.63749	5.20606	1.78058	2.78832	5.42923	3.74381	0.525681	0.268754
		0.666667	6.18822	2.08372	3.06879	2.8759	6.51167	1.62516	3.00945	4.50385	3.73335	0.64373	0.370518
		1	5.0509	1.70974	2.7794	2.78373	6.13034	1.49477	2.94497	4.26385	3.39471	0.572979	0.246235
		1.33333	5.15569	1.85933	2.58484	2.8481	6.21003	1.45846	2.86462	4.50154	3.43533	0.591322	0.287659
		1.66667	4.42635	1.55223	2.45906	2.75747	6.09087	1.46479	2.84031	5.33615	3.3659	0.609512	0.33741
		2	2.86986	1.37888	2.00164	2.21112	6.22269	1.33743	2.87812	5.32923	3.02862	0.638742	0.199615
		2.33333	2.41297	1.26801	1.82673	2.24459	5.95681	1.2329	2.81364	5.10231	2.85724	0.618875	0.194908
		2.66667	2.1517	1.43168	1.95152	2.49176	6.07895	1.28929	3.00169	4.06615	2.80784	0.563544	0.218539
		3	1.36088	1.31465	1.90583	2.56282	5.85924	1.04915	2.87542	3.71538	2.58042	0.56719	0.152883
		3.33333	1.11218	1.04802	1.99132	2.43769	6.11172	1.1589	2.8052	3.56154	2.52832	0.602874	0.188097
		3.66667	0.627345	0.974985	1.89797	2.33471	6.36718	0.976252	2.85145	2.48769	2.3147	0.645702	0.141555
		4	1.13593	1.25129	1.89355	2.39238	6.18322	0.848341	2.83457	3.05538	2.44933	0.604939	0.236876
		4.33333	0.876048	0.88523	1.84589	2.39341	6.13555	0.894004	2.69379	3.33077	2.38184	0.628155	0.246001
		4.66667	0.836926	1.21345	1.60023	2.3723	6.53402	0.82991	2.65024	1.75308	2.22377	0.658454	0.200308
		5	0.997605	1.26889	1.38651	2.53914	6.4439	0.769943	2.69716	4.73462	2.60472	0.713471	0.403244
