# Supplementary material for: Peripheral glia and neurons jointly regulate activity-induced synaptic remodeling at the Drosophila neuromuscular junction
Source: eLife. 2025 Nov 21;14:RP104126. doi: 10.7554/eLife.104126 (PMC12638043; doi:10.7554/eLife.104126)
Supplement: Figure 5—source data 1. [file elife-104126-fig5-data1.xlsx]

## Sheet: Fig 5B
Genotype		REPO-GAL4>Trip		shv1; REPO-GAL4		shv1 ;REPO-GAL4>shv
Analysis	pFAK
Treatment		unstim	stim	unstim	stim	unstim	stim
		0.867502	1.56846	0.217462	0.94568	0.530916	0.0478457
		1.13636	0.794181	0.625299	0.777403	0.404148	0.783179
		0.996141	2.02119	0.741174	0.456945	0.386017	0.340889
		1.29995	2.90615	0.312875	0.606905	0.31132	0.59453
		0.764448	1.53854	0.863489	0.560197	0.468541	0.179025
		0.935605	1.34118	0.938254	0.842894	1.08025	0.47832
		0.736119	1.23214	0.39368	0.552193	1.1912	1.23874
		0.857769		0.544114	0.716325	0.684423	1.32838
		0.958107		0.695884	0.624596	1.00469	1.13135
		1.448
		0.918456
		0.784473
		1.29707
Descriptive statistics	Sample size (n)	13	7	9	9	9	9
	Normalized mean	1	1.62289	0.59247	0.675904	0.6735	0.680251
	Std. Error of the Mean	0.0630141	0.258425	0.0822904	0.0522586	0.111304	0.15637
t-test of stim vs. unstim (unpaired)			0.0493068		0.406936		0.972425
Tukey's test to driver control (after one-way ANOVA)				0.00416903		0.0231071

## Sheet: Fig 5C
Genotype		REPO-GAL4>Trip		REPO-GAL4>shv-RNAi		REPO-GAL4>shv
Analysis	pFAK
Treatment		unstim	stim	unstim	stim	unstim	stim
		1.48097	1.94332	1.44121	1.71899	0.514205	1.6326
		0.519033	1.87905	0.55125	1.16326	0.863467	1.67423
		1.02582	2.19833	2.08888	1.32055	0.669326	0.55797
		1.17554	1.51892	2.69316	2.91216	0.369239	0.207285
		0.971054	3.22423	0.67996	1.50795	0.56666	0.252756
		0.827593	0.49694	0.936488	1.61539	1.11932	0.811238
		1.11396	0.955955	1.66935	2.41912	0.963541	0.801438
		0.886042	1.75428	2.27359	3.04548	0.731609	1.28565
		1.52331	1.15675	1.37475	3.22498	2.25911	1.35509
		0.794359	2.09351	2.13312	2.32512	0.96247	0.911919
		1.02706	1.59392	2.00469	2.27874	0.580319	0.605242
		0.65528	1.68872	1.74749	2.10326	1.07119	1.48304
		0.64956	2.00475	2.31534	3.03486	0.40979	1.15479
		0.759531	2.14432	1.97643		0.700809	0.791564
		0.931177	1.72093	1.3297		0.899221	1.09669
		1.05839	2.73167	2.9864		0.677392	0.783918
		1.60134	1.42146	0.941695			0.241036
		0.914781	0.813129				0.36549
		0.736322	2.25265				0.229217
		1.3489	1.36008				1.45503
		0.753453	1.41416				0.473561
		0.947414	1.69076				0.314897
		1.29913	2.55523				0.294392
			1.79875
Descriptive statistics	Sample size (n)	23	24	17	13	16	23
	Normalized mean	1	1.76716	1.71432	2.20537	0.834854	0.81648
	Std. Error of the Mean	0.0610888	0.124206	0.168084	0.195277	0.11032	0.102243
t-test of stim vs. unstim (unpaired)			3.57213e-06		0.0678859		0.903484
Tukey's test to unstim driver control (after one-way ANOVA)				0.000144236		0.464617

## Sheet: Fig 5D
Genotype		shv1; nSyb-GAL4>shv		shv1; REPO-GAL4>shv				Genotype		shv1; nSyb-GAL4>shv		shv1; REPO-GAL4>shv
Analysis	HAextra							Analysis	HA
Treatment		unstim	stim	unstim	stim			Treatment		unstim	stim	unstim	stim
		0.882095	3.68376	1.19375	0.269429					0.964418	0.619387	0.678714	1.25012
		1.26972	2.34549	0.612692	0.204532					1.30689	1.70537	1.8973	1.24879
		0.705689	2.01319	1.19356	1.01361					0.987339	1.10957	0.771209	0.971669
		1.1425	1.06628	0.881005	1.48496					0.74135	1.72351	0.652781	0.810995
		0.729728	0.868004	1.06471	0.733008					1.15947	2.0642	1.3179	0.66485
		1.21691	3.2333	1.05428	0.484872					0.444114	1.08139	1.08705	0.299232
		1.05337	3.18042	0.689517	0.746601					1.25256	1.43035	0.625081	0.854505
		0.332391	5.27155	0.867642	1.08601					1.14386	0.906888	0.969977	1.34189
		0.136419	3.44512	1.44284	0.117837					1.53959	0.868951	1.46144	1.381
		0.624156	2.39806		0.0785822					0.571506	0.813065	0.538556	1.36248
		2.96068	1.30705							0.943379	0.977863	0.942652	1.72623
		0.946353	1.09798							0.945528	0.813756	1.05735
		0.814569								1.18308	1.41773
		1.09816								0.816918	1.00718
		1.08727									0.487877
Descriptive statistics	Sample size (n)	15	12	9	10			Descriptive statistics	Sample size (n)	14	15	12	11
	Normalized mean	1	2.49252	1	0.621944				Normalized mean	1	1.13514	1	1.08289
	Std. Error of the Mean	0.16254	0.382922	0.0879024	0.149372				Std. Error of the Mean	0.0787751	0.114665	0.115595	0.121761
t-test of stim vs. unstim (unpaired)			0.00270708		0.0462318			t-test of stim vs. unstim (unpaired)			0.340853		0.626693

## Sheet: Fig 5E
Genotype		shv-eGFP/+	shv-eGFP ; REPO-GAL4>shv-RNAi	shv-eGFP ; nSyb-GAL4>shv-RNAi
Analysis	GFP
		1.04581	1.85265	2.929
		0.592737	1.71502	3.86743
		1.36145	1.26534	0.982655
		0.849996	1.4711	0.931506
		1.15772	2.73118	2.1345
		0.789401	2.0192	2.21542
		1.20289	1.75024	2.77334
		1.04744	2.09613	3.45604
		0.905543	1.15845	2.77492
		0.903158	4.15353	1.90547
		0.944077	2.73677	2.83927
		1.19978	4.17064	0.545444
		1.01852	1.00212	1.70881
		0.981477	0.910133	4.10012
		1.41746
		0.814153
		0.768382
		1.04785
		0.906953
		1.0452
Descriptive statistics	Sample size (n)	20	14	14
	Normalized mean	1	2.07375	2.36885
	Std. Error of the Mean	0.0439098	0.269512	0.279665
Tukey's test to shv-eGFP/+ (after one-way ANOVA)			0.001422	5.5122e-05
