# Supplementary material for: Peripheral glia and neurons jointly regulate activity-induced synaptic remodeling at the Drosophila neuromuscular junction
Source: eLife. 2025 Nov 21;14:RP104126. doi: 10.7554/eLife.104126 (PMC12638043; doi:10.7554/eLife.104126)
Supplement: Figure 6—figure supplement 1—source data 1. [file elife-104126-fig6-figsupp1-data1.xlsx]

## Sheet: Fig 6 sup1
Genotype		Control		mhcGluRIIA						Control		mhcGluRIIA
Analysis	GLURIIA							Analysis	GLURIIC
Treatment		unstim	stim	unstim	stim			Treatment		unstim	stim	unstim	stim
		0.931126	1.35999	1.46347	1.79945					0.965842	0.86606	1.14791	1.07476
		1.01104	1.07564	1.3208	1.81663					0.978585	1.25659	1.42008	1.09474
		1.05784	1.07485	1.6394	1.67994					0.966592	1.21587	1.53605	1.39984
		0.897149	1.29892	1.50873	2.60341					1.08898	1.12552	1.44294	1.22163
		0.925997	1.3646	2.39066	2.98312					0.745996	1.4303	0.998841	1.34313
		0.972423	1.24057	2.02713	1.84552					1.17118	1.63542	1.07341	1.0903
		1.20443	1.58795	3.41917	2.9778					0.892714	1.41335	1.27737	1.09965
		0.750809	0.962166	3.37619	2.63818					1.19011	1.49101	1.72694	1.25681
		1.23737	1.099	2.66237	2.69164					1.1716	1.6156	1.97679	1.34639
		1.07704	0.838694	3.4904	2.18731					0.828399		1.77053	1.51592
		0.93478	0.949564	2.35006	2.95126							1.85109	1.27629
		1.07345		2.81448	1.28392								1.32179
		0.896968		3.28943	1.64363								1.44753
		0.970137		2.76908	1.50474								0.963981
		1.05945
Descriptive statistics	Sample size (n)	15	11	14	14			Descriptive statistics	Sample size (n)	10	9	11	14
	Normalized mean	1	1.16836	2.46581	2.18618				Normalized mean	1	1.33886	1.47472	1.24663
	Std. Error of the Mean	0.0320627	0.0670664	0.207605	0.160908				Std. Error of the Mean	0.0484224	0.0827091	0.0993554	0.0433116
t-test of stim vs. unstim (unpaired)			0.0392649		0.297443			t-test of stim vs. unstim (unpaired)			0.00363189		0.0541892
t-test to unstim control (unpaired)				7.51045e-06				t-test to unstim control (unpaired)				0.00065602
