# Supplementary material for: Peripheral glia and neurons jointly regulate activity-induced synaptic remodeling at the Drosophila neuromuscular junction
Source: eLife. 2025 Nov 21;14:RP104126. doi: 10.7554/eLife.104126 (PMC12638043; doi:10.7554/eLife.104126)
Supplement: Figure 6—figure supplement 2—source data 1. [file elife-104126-fig6-figsupp2-data1.xlsx]

## Sheet: Fig 6 sup2
Genotype		nSyb-GAL4>control		nSyb-GAL4>shv-RNAi								nSyb-GAL4>control		nSyb-GAL4>shv-RNAi
Analysis	BOUTON SIZE									Analysis	GLUR3
Treatment		Vehicle		Vehicle		2 mM glutamate				Treatment		Vehicle		Vehicle		2 mM glutamate
		unstim	stim	unstim	stim	unstim	stim					unstim	stim	unstim	stim	unstim	stim
		1.11969	1.86847	0.774843	0.952711	0.964403	0.646134					1.00614	1.26728	0.750329	0.6041	0.802141	0.832383
		1.03606	3.06976	1.00765	1.06816	0.735793	0.716571					0.862392	1.36853	1.00079	0.930168	0.736841	0.781601
		0.844254	2.40041	0.731328	0.789421	0.589972	0.870994					1.13146	1.36853	0.80627	0.746474	0.815709	0.837625
		0.790377	1.53702	0.613571	0.969781	0.760466	1.01646					0.987428	1.1374	0.326701	0.490954	0.77377	0.561136
		1.21519	1.42656	0.666735	0.823109	0.579213	0.751166					0.99426	1.49885	0.399477	0.510421	0.999174	1.00916
		0.994435	1.34958	0.69957	0.727427	0.646881	0.92769					1.01831	1.18981	0.828472	0.716598	0.990484	0.946241
		1.02465	1.49012	1.02307	0.657819	0.753765	0.944481					0.913836	0.994177	0.901003	0.972271	0.912016	1.01711
		0.762604	1.72266	0.63986	0.785649	0.798232	1.00047					0.941469	1.00351	0.673564	0.945781	0.804615	0.932986
		1.15723	1.8309	0.637569		0.893629	0.82192					1.09711	1.3024	0.839402		0.298808	0.789331
		1.05552	1.11875	0.654042		0.877069	0.823351					1.04758	1.071	0.865455		0.267907	0.899238
		1.14405	1.22031	0.668105		0.682278	0.662681					1.05991	1.71457	0.958551		0.306346	0.859291
		0.982072	1.6802			0.874705	0.739389					0.973962	1.10866			0.927931	0.786482
		0.873874	1.4319			0.744262						0.966132	1.37342			0.920844
		1.19857	1.6757			0.715406						0.918333	1.31502			0.647104
		0.872888	1.29292			0.560997						1.05816	1.14869			0.646658
		0.988676	1.15243			0.650652						0.984466	1.24642			0.930661
		0.939866	1.09126									1.03904	1.42518
		0.936999	1.15437									0.93187	1.19669
		1.07432										1.00995
		0.98868										1.05818
Descriptive statistics	Sample size (n)	20	18	11	8	16	12			Descriptive statistics	Sample size (n)	20	18	11	8	16	12
	Normalized mean	1	1.58407	0.737849	0.84676	0.739233	0.826776				Normalized mean	1	1.26279	0.759092	0.739596	0.736313	0.854383
	Std. Error of the Mean	0.0290581	0.117348	0.0435962	0.0487156	0.0299939	0.0366428				Std. Error of the Mean	0.0149283	0.0429218	0.0651444	0.0689523	0.0612882	0.0356741
t-test of stim vs. unstim (unpaired)			0.000114636		0.115588		0.0773497			t-test of stim vs. unstim (unpaired)			9.54407e-06		0.839739		0.109344
Tukey's test to unstim vehicle control (after one-way ANOVA)				8.48671e-06		1.10287e-06				Tukey's test to unstim vehicle control (after one-way ANOVA)				0.00277362		0.000249347
