# Supplementary material for: Peripheral glia and neurons jointly regulate activity-induced synaptic remodeling at the Drosophila neuromuscular junction
Source: eLife. 2025 Nov 21;14:RP104126. doi: 10.7554/eLife.104126 (PMC12638043; doi:10.7554/eLife.104126)
Supplement: Figure 6—source data 1. [file elife-104126-fig6-data1.xlsx]

## Sheet: Fig 6A
	Genotype	nSyb>iGluSnFR
			REPO-LexAop>	REPO-LexA>LexAop-shv-RNAi	REPO-LexA>LexAop-shv	ELAV-LexA>LexAop-shv		REPO-LexA	mhcGluRIIA
	Analysis	iGluSnFR signal
			0.865909	0.698944	0.867626	0.947386		1.08435	1.0568
			1.13409	1.09361	0.914621	0.981518		1.02916	1.00942
			0.851309	0.920888	1.12653	0.77104		0.924515	1.19394
			1.08178	0.623873	1.56594	0.861233		0.96197	0.920804
			1.06691	0.604368	1.12512	0.781497		0.896357	0.783489
			0.989168	0.639409	2.17057	0.703383		0.955585	1.08986
			0.73112	0.215745	1.42739	1.5377		1.10359	0.95889
			1.27971	0.261844	1.67713	0.587027		1.04447	0.975962
			1	0.260264	1.32942	0.758456		0.932929	1.22029
			0.879512	0.222573	1.78548	0.529654		1.04911	1.55328
			1.12049	0.408478	1.35753	1.06688		1.17426	1.23403
			0.950902	0.272146	1.28943	1.01459		0.843702	0.922661
			0.968154	0.26908	1.2241			0.886854
			0.906226	0.203117	1.2909			1.1331
			1.17472	0.147093	1.72311
			1.03119		1.50551
			0.868057		1.70527
			1.224		1.09102
			0.876757		1.27218
			1.08435		1.1729
			1.02916		1.27153
			0.924515		1.17944
			0.96197		1.37098
			0.896357		0.91751
			0.955585		1.16775
			1.10359		1.16519
			1.04447
			0.929837
			1.04563
			1.17037
			0.840906
			0.883915
			1.12934
	Descriptive statistics	Sample size (n)	33	15	26	12		14	12
		Normalized mean	1	0.456096	1.33439	0.878363		1.00143	1.07662
		Std. Error of the Mean	0.0219221	0.0750911	0.058792	0.0767172		0.027005	0.0583461
	Tukey's test to control (after one-way ANOVA)			1.07531e-09	5.2645e-06	0.439375	t-test to control (unpaired)		0.259734

## Sheet: Fig 6B
Genotype		REPO-GAL4>control				REPO-GAL4>shv-RNAi							Genotype		REPO-GAL4>control				REPO-GAL4>shv-RNAi
Analysis	BOUTON SIZE												Analysis	GLUR3
Treatment		Vehicle		2 mM glutamate		Vehicle		2 mM glutamate					Treatment		Vehicle		2 mM glutamate		Vehicle		2 mM glutamate
		unstim	stim	unstim	stim	unstim	stim	unstim	stim						unstim	stim	unstim	stim	unstim	stim	unstim	stim
		1.03455	1.22317	1.55722	1.48269	1.03882	1.20055	1.19789	1.26312						1.02947	1.49908	1.35581	1.13426	2.37854	0.7481	1.8134	0.7481
		1.17596	1.07547	1.71609	1.48058	1.22155	1.14117	0.901555	1.19485						1.12446	1.59708	1.29291	1.30683	2.14999	0.644979	1.43072	0.644979
		0.84619	1.28659	1.25703	1.54696	1.1146	1.38362	1.25331	1.36889						0.95353	1.53192	1.66854	1.32167	2.25617	0.671171	0.867836	7.74509
		0.943304	0.934736	1.22412	1.26818	1.2513	1.12251	1.13678	1.17411						0.892543	2.46939	1.87927	1.8212	2.80973	7.16508	0.459809	7.26734
		0.981246	1.06474	0.886926	1.11924	1.20946	0.948736	1.26402	1.50184						1.66229	3.02319	0.944316	1.97551	2.83511	8.50662	0.931272	7.63199
		1.21873	1.50991	1.30577	1.02058	1.07081	1.12463	1.16295	0.999076						0.752588	5.1285	2.23271	2.29138	2.11933	6.79289	0.456463	7.16086
		0.935814	1.55421	1.16396	1.00923	1.23249	1.19014	0.867126	1.14057						0.274134	5.8469	0.988662	1.84684	4.1582	3.56007	0.870435	4.7949
		0.893851	1.80482	1.53187	1.46221	1.6378	1.21839	0.891384	0.922937						1.33326	1.25562	1.02108	1.85645	2.39402	3.1927	0.873739	4.28085
		0.970358	1.3947	1.21971	0.960543	0.809626	1.14981	0.869417	1.08071						0.97773	0.91954	1.07585	1.58313	4.01528	3.90459	1.45638	4.77732
		1.0127	1.50994	0.838728	1.34322	1.11264	1.00073	0.856469	1.12826						0.879164	1.32093	1.22235	0.66703	4.61624	2.46441	0.828052	3.5398
		0.98736	1.65091	1.27804	1.38095	1.2287	1.12378	0.81612	1.19912						0.918941	0.931879	1.37269	1.12903	6.90624	2.94003	1.52954	3.47422
		0.957249	1.34762	1.42761	1.4893	0.930227		1.08535							1.02354	1.23037	1.96808	0.972737	5.83061		0.884692	3.08178
		0.933156	0.920426	1.33499	0.838551	1.23723		0.988577							1.17835	1.58169	1.71206	0.8936	4.52654		3.30668	4.65426
		1.06272	1.12691	1.17967	0.931826	0.910129		1.00374							0.688218	2.33604	1.8548	1.17731	3.60602		2.53456	5.32822
		1.13153	1.89523		1.07557	0.919182									0.47305	1.51169	1.73579	1.72592	3.05917		2.53775
		0.872592				1.12665									0.94384	0.987247		1.21542	4.09951		0.907675
						0.870395									1.89489	1.2604			3.59856		1.37871
															1.30989	1.31595			4.15153
															0.953111	1.52754			4.21322
															0.762038	1.72826			2.22264
															1.23268				2.5372
															1.05393
															0.688358
Descriptive statistics	Sample size (n)	17	16	15	16	17	11	14	11				Descriptive statistics	Sample size (n)	23	20	15	16	21	11	17	14
	Normalized mean	1	1.34078	1.29966	1.24551	1.11304	1.14582	1.02105	1.17941					Normalized mean	1	1.95016	1.48833	1.43239	3.54685	3.69006	1.35692	4.65212
	Std. Error of the Mean	0.0264147	0.0778572	0.0635917	0.0628177	0.0480968	0.0341368	0.0425899	0.0485887					Std. Error of the Mean	0.0731798	0.295652	0.104406	0.112785	0.27915	0.821965	0.192195	0.613938
t-test of stim vs. unstim (unpaired)			0.000353407		0.559537		0.583079		0.0228716				t-test of stim vs. unstim (unpaired)			0.0051171		0.718552		0.871634		0.000111803
Tukey's test to unstim vehicle control (after one-way ANOVA)				0.000418979		0.266732		0.984059					Tukey's test to unstim vehicle control (after one-way ANOVA)				0.278822		5.44009e-15		0.522135
