# Supplementary material for: Peripheral glia and neurons jointly regulate activity-induced synaptic remodeling at the Drosophila neuromuscular junction
Source: eLife. 2025 Nov 21;14:RP104126. doi: 10.7554/eLife.104126 (PMC12638043; doi:10.7554/eLife.104126)
Supplement: Figure 7—source data 1. [file elife-104126-fig7-data1.xlsx]

## Sheet: Fig 7C
	Genotype		repo-GeneSwitch >												Genotype		repo-GeneSwitch >
			Control		UAS-rpr		Control		UAS-rpr		UAS-rpr						Control		UAS-rpr		Control		UAS-rpr		UAS-rpr
	Analysis	BOUTON SIZE													Analysis	GLUR3
	Treatment		EtOH				RU486				RU486 + 2 mM Glu				Treatment		EtOH				RuU486				RU486 + 2 mM Glu
			unstim	stim	unstim	stim	unstim	stim	unstim	stim	unstim	stim					unstim	stim	unstim	stim	unstim	stim	unstim	stim	unstim	stim
			1.1138	1.37839	0.946789	1.08438	0.879037	0.919653	0.987808	0.93282	0.848876	1.62343					0.628218	2.14633	0.838362	1.71301	0.904389	1.41479	1.47396	0.908511	0.964755	1.44851
			1.24062	1.19231	1.11433	0.898595	0.71069	0.965052	1.25672	0.733178	0.999026	1.58658					0.743513	1.25075	1.18605	1.4816	1.18404	1.66257	1.41894	1.04908	0.769628	1.14103
			0.77645	1.42628	0.887666	1.03549	1.04756	1.3095	0.950574	1.33268	1.25922	0.896115					1.26452	1.65053	0.720009	1.38716	1.4406	1.29612	1.25867	1.49634	0.762057	1.23608
			0.869134	1.32324	1.13714	1.16708	0.824275	1.1887	0.982987	1.0867	0.908397	1.69429					1.07348	1.17267	0.88584	1.05632	0.882419	1.20671	2.34952	0.843988	1.14923	1.16347
			1.02735	1.39904	1.11501	1.22365	0.693305	1.32558	0.950874	1.09736	1.10271	1.45148					1.29027	1.60742	1.11405	2.06609	1.06819	1.35264	2.33002	1.16298	1.16291	1.73269
			0.7454	1.45049	0.914075	1.19075	0.975255	1.58756	0.794538	0.701499	0.909911	1.51352					0.895285	1.51335	1.50096	2.10964	0.873941	1.18619	1.93159	1.49306	0.967884	1.55208
			1.18147	1.36073	1.30219	1.25989	0.8628	1.32387	0.89248	0.706619	0.887525	1.47198					1.06258	1.34511	1.41249	1.87567	1.17545	1.35642	2.34494	2.08492	1.01581	1.80397
			1.09351	1.16711	0.880444	1.5179	0.819371	1.40061	1.08878	0.984538	1.08379	1.7657					0.860467	1.40158	1.39206	1.98288	1.30925	1.29983	1.35267	1.59491	1.08751	1.43131
			0.95226	1.17032	1.26574	1.61517	1.09358	1.26258	1.32302	1.10699	1.10369	1.55544					1.18167	1.50237	1.41376	1.49395	1.10828	1.28192	1.1599	1.86437	1.21209	1.50771
			1.00053	2.06766	1.0213	1.64894	1.22425	1.6752	1.28172	0.80565	1.08889	1.26661					1.01301	1.51119	1.43411	1.66859	0.740161	1.52537	1.29692	1.20364	0.908518	1.68922
			0.96568	1.26589	1.16486	1.48758	0.984865	1.2168	1.07078	1.35663	1.23153	2.1071					0.921897	1.65755	1.52972	0.907573	0.814374	1.01424	1.37177	1.21696	1.23457	1.5175
			0.963418	1.47732	1.07654	1.81078	1.06417	1.16833	1.13118	1.04523		1.57971					0.779467	1.89362	1.0163	0.755735	1.02794	1.27292	1.53249	1.44039	1.29467	1.95385
			1.07038	1.35324	0.758977	1.35101	0.972629	1.3582	1.10874	0.960308		1.63588					1.21647	1.45951	1.09694	1.11081	0.78643	1.05703	1.48808	1.10402
			0.841325	1.38482	0.888562	1.50831	0.946446	1.14236	1.27212	1.27765							1.06915	1.98308	1.21913		0.826982	1.46831	1.36714	1.24783
			1.14568	1.42518	0.760755	1.40813	1.03189	1.55951	1.12738	0.993264							0.922181	1.16116	1.0856		0.740816	0.96761		1.46692
			1.14162	1.06842	1.14377	1.3917	0.810556	1.49501	1.29541	0.802458							1.16439	0.862667						1.24622
			0.849773	1.36038	1.14622	1.07395	0.94827	1.2553	1.28684	0.996807							0.876362	1.45706
			1.0216	1.42595	0.938367		0.893044	1.48316	1.2211	0.978435							1.03707	1.48566
			1.02924	1.72104	0.899103			1.22335		1.38684							0.802596	1.532
			0.97262	1.26692				1.08563		1.46259							1.02952	2.25269
			1.1355	1.45066						1.42776							1.16789	2.27125
			0.862635	1.44367													0.984468	2.50361
			0.94971	1.58628													0.913017	1.0125
			1.00622	1.66889													1.05152	1.221
			1.04407	1.61576													1.05099	0.8534
			0.911861	1.20841													0.939941	1.76253
			1.04948	1.48392													0.948192	1.39033
			0.849191	2.4531													1.11187	1.26782
			1.18947	1.91442													1.05893	1.46649
			1.22541	1.57383													0.941069	1.7101
			0.750886	1.39941														1.57046
			1.02371	1.51936														1.56362
			0.957695	1.2027
			1.0423	1.92453
				1.68174
				1.62485
	Descriptive statistics	Sample size (n)	34	36	19	17	18	20	18	21	11	13			Descriptive statistics	Sample size (n)	30	32	15	13	15	15	14	16	12	12
		Normalized mean	1	1.48434	1.01904	1.33372	0.932333	1.2973	1.11239	1.056	1.03851	1.54983				Normalized mean	1	1.54498	1.18969	1.50839	0.992217	1.29085	1.61976	1.33901	1.04414	1.51478
		Std. Error of the Mean	0.0226113	0.0460746	0.0364566	0.0599371	0.0319931	0.0444454	0.0375709	0.0524679	0.0418562	0.0766998				Std. Error of the Mean	0.0282459	0.0682487	0.0656658	0.12418	0.0558152	0.0489097	0.114581	0.0822542	0.0507899	0.0732326
	t-test of stim vs. unstim (unpaired)			9.372e-13		0.000123324		1.25214e-07		0.388161		1.44064e-05			t-test of stim vs. unstim (unpaired)			4.68213e-09		0.0355237		0.000403869		0.0579195		3.86009e-05
	Tukey's test to unstim EtOH control (after one-way ANOVA)				0.990478		0.492474		0.0644856		0.938139				Tukey's test to unstim EtOH control (after one-way ANOVA)				0.120865		0.999978		2.66843e-10		0.985007
