# Supplementary figures and images for: Peripheral glia and neurons jointly regulate activity-induced synaptic remodeling at the Drosophila neuromuscular junction
Source: eLife journal article supplement (doi:10.7554/elife.104126), 2025-01-06

Fig 2- figure supplement 1B

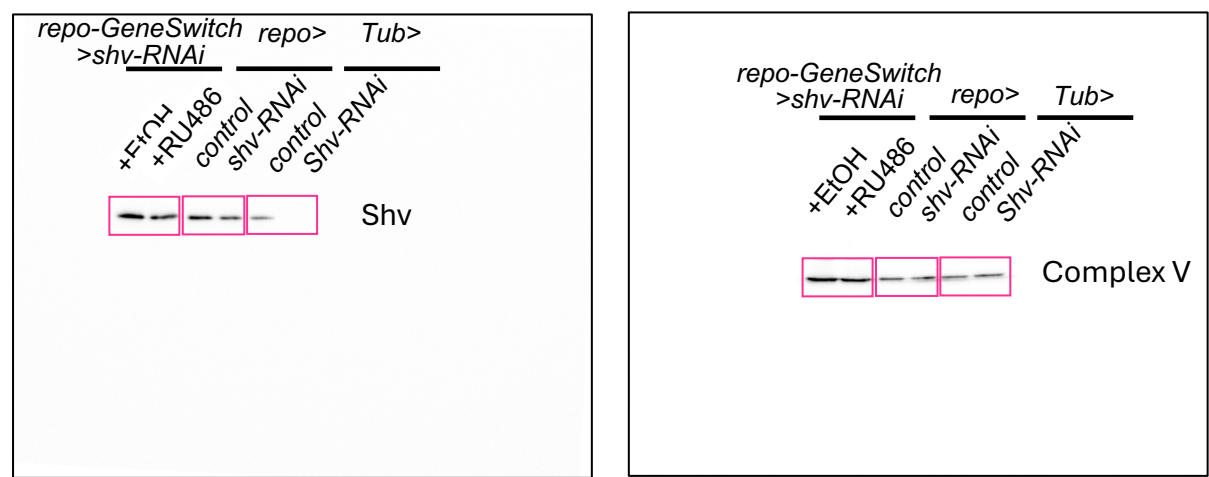

Overlay to show molecular weight marker

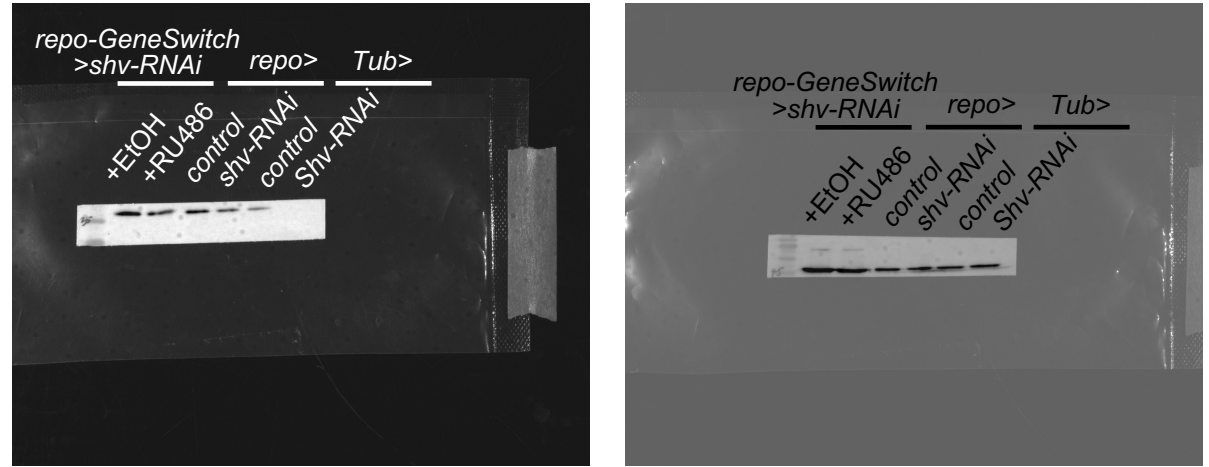

Supplement: fig2-figsupp1-data2 [file Figure 2 figure supplement 1 source Data 2 labeled blots.pdf › fig 2 fig suppl 1 source data 2/Figure 2 figure supplement 1 source Data 2 labeled blots.pdf]

Fig 5 – figure supplement 1A

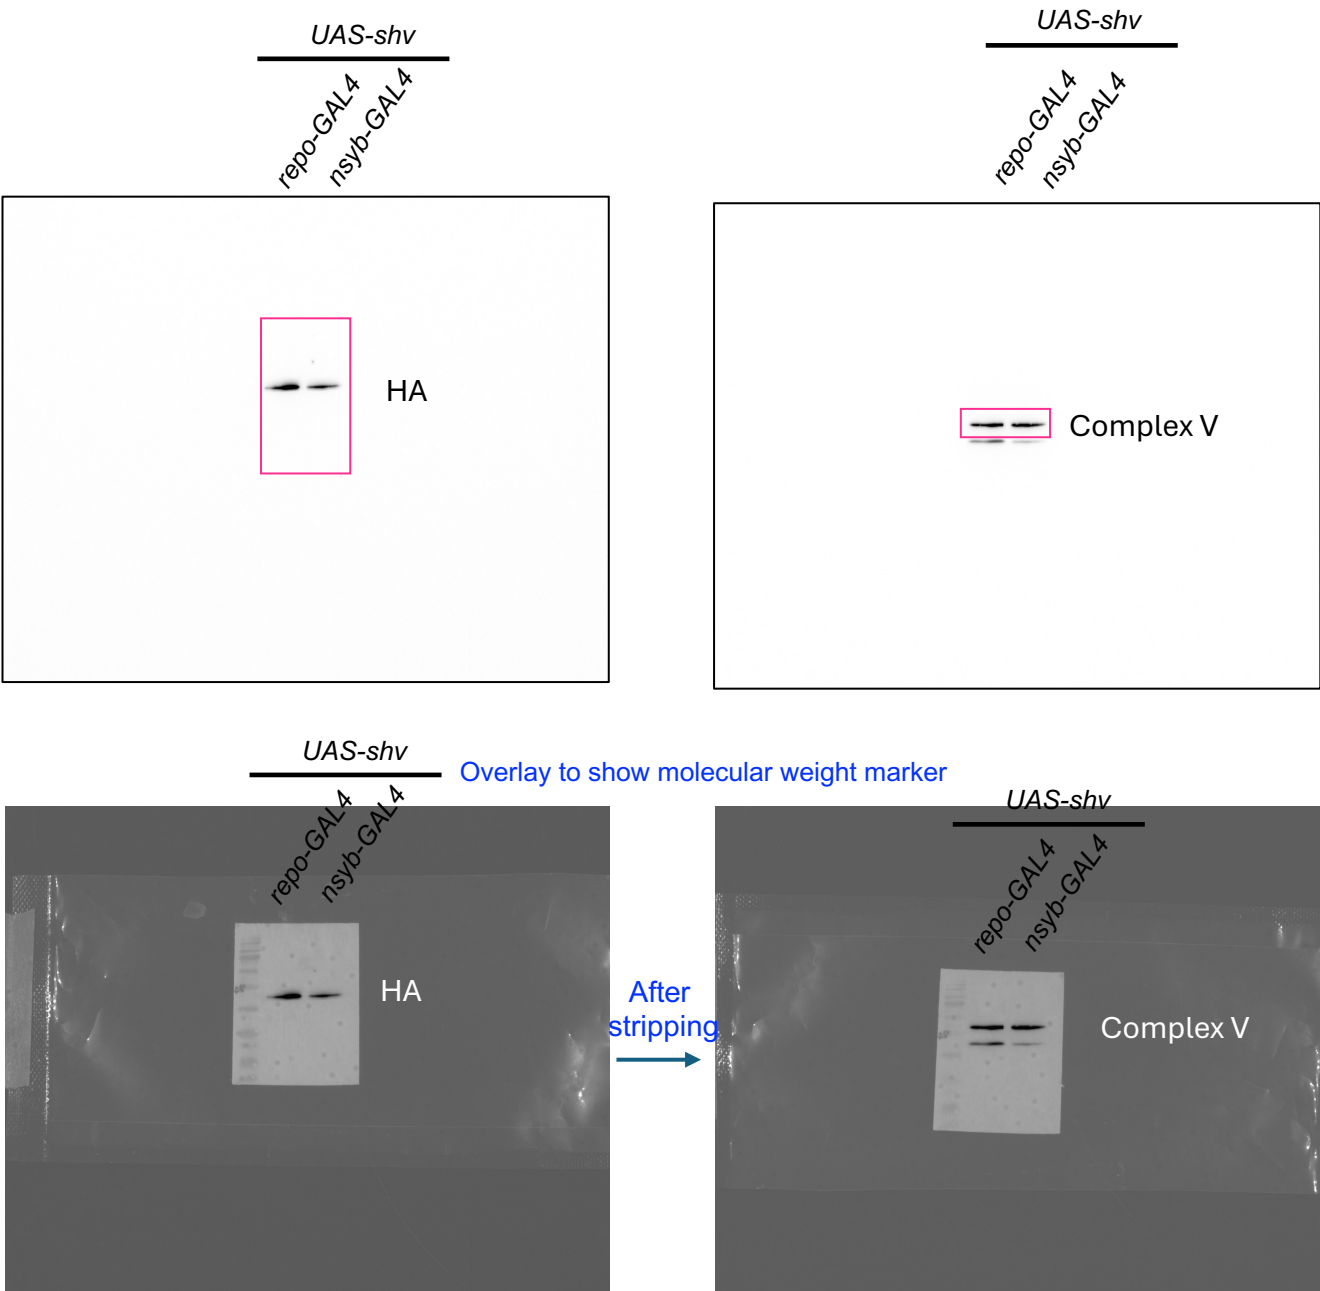

Supplement: fig5-figsupp1-data1 [file Figure 5 figure supplement 1 Source data 1 labeled blots.pdf › fig 5 fig suppl 1 source data 1/Figure 5 figure supplement 1 Source data 1 labeled blots.pdf]
